# Supplementary material for: Spontaneous binding of potential COVID-19 drugs (Camostat and Nafamostat) to human serine protease TMPRSS2
Source: PubMed Central journal article supplement — Comput Struct Biotechnol J. 2020 Dec 28;19:467–76. doi: 10.1016/j.csbj.2020.12.035 (PMC7809394; doi:10.1016/j.csbj.2020.12.035), 2020-12-28
Supplement: mmc3.pdf [file mmc3.pdf]

## Supplementary Information

### Spontaneous binding of potential COVID-19 drugs (Camostat and Nafamostat) to human serine protease TMPRSS2

Haixia Zhu<sup>a, †</sup>, Wenhao Du<sup>a, †</sup>, Menghua Song<sup>a</sup>, Qing Liu<sup>b</sup>, Andreas Herrmann<sup>c</sup> and Qiang Huang<sup>a, d, \*</sup>

<sup>a</sup>State Key Laboratory of Genetic Engineering, Shanghai Engineering Research Center of Industrial Microorganisms, MOE Engineering Research Center of Gene Technology, School of Life Sciences, Fudan University, Shanghai 200438, China

<sup>b</sup>State Key Laboratory of Quality Research in Chinese Medicines, School of Pharmacy, Macau University of Science and Technology, Macau, China

<sup>c</sup>Institute for Biology and IRI Lifesciences, Humboldt-Universität zu Berlin, 10115 Berlin, Germany

<sup>d</sup>Multiscale Research Institute of Complex Systems, Fudan University, Shanghai 201203, China

†These first two authors contributed equally to this work.

\*Corresponding authors. Email address: huangqiang@fudan.edu.cn (Q. Huang)

#### Table of Content

- Fig. S1. Amino-acid sequence alignment of TMPRSS2-ECD and serine protease hepsin.
- Fig. S2. Time-dependent RMSDs of the TMPRSS2-ECD model in the MD refinement.
- Fig. S3. Structural alignment of the catalytic amino acids of TMPRSS2 with trypsin and a predicted model hTMPRSS2.
- Fig. S4. A system for the spontaneous binding simulations.
- Fig. S5. Spontaneous binding processes to the catalytic center of TMPRSS2 in successful binding trajectories.
- Fig. S6. 3D distributions of the Aps/Glu residues and oxygen atoms in/around the substrate-binding cavity of TMPRSS2.
- Fig. S7. The average RMSDs of drugs binding to the TMPRSS2 catalytic center.
- Fig. S8. Binding free energies of the drug-TMPRSS2 complexes formed in the spontaneous binding simulations in Fig. 3.
- Fig. S9. The binding energy landscapes of all 30 spontaneous simulation trajectories.
- Movie S1. A typical spontaneous binding trajectory of Camostat to TMPRSS2.
- Movie S2. A typical spontaneous binding trajectory of Nafamostat to TMPRSS2.

## Figures

```

TMPRSS2  -----NRCVRLYGPNFIIQVYSSQRKSWHPVCQDDWENYGRAACRDMGYKNNFYSSQGI  200
1Z8G    SDQEPLYPVQVSSADARLMVFDKTEGTRWLLCSSRSNARVAGLSCEEMGFLRALTHSELD  60
          *:: . : * *::.. . :*: :*. . * . . *::**:: . : * :

TMPRSS2  VDDSG---STSFMKLNLSAGNVDI---YKKLYHSDACSSKAVVSLRCCIACGVNLSNRQS  254
1Z8G    VRTAGAAGTSGFFCVDE--GRLPHTQRLLLEVISVCDPCRGRFLAaicQDcGRR--KLPVD  116
          * : *  ::: * : : : * :  : :  * . . : : * * * . . .

TMPRSS2  RIVGGESALPGAWPWQVSLHVQNVHVCSSIIITPEWIVTAAHCVEKPLNNPWHWTAFAGI  314
1Z8G    RIVGGRDTSIGRWPWQVSLRYDGAHLCCGSLLSGDWVLTAAHCFFERNRVLRSRWRVFAGA  176
          ***** . : * ***** : : . * : : : : : : : : : : : : : : * . *****

TMPRSS2  LRQSFMFYAGYQVEKVIS-----HPNYDSKTKNNDIALMKLQKPLTFNDLVKPVCLPN  368
1Z8G    VAQASPH-GLQLGVQAVVYHGGYLFFRDPNSEENSNDIALVHLSPLPLTEYIQPVCLPA  235
          : * : . *   * : * :   . : : * : : . ***** : : . * * : : : : *****

TMPRSS2  PGMLLQPEQLCWISEGWGATEEKGTSEVLNAAKVLLIETQRCNSRYVYDNLITPAMICAG  428
1Z8G    AGQALVDGKICTVTGWGNTQYVGGQAGVLEARVPIISNDVCNGADFYGNQIKPKMFCAG  295
          * *   : : * : : * : * : : * : * : * : . . : * . . * * * * : : * : * : * : * :

TMPRSS2  FLQGNVDSQCQDGGGGLVTS---KNNIWWLIGDTSWGSCKAKYRPGVYGNVMVFTDWI  484
1Z8G    YPEGGIDACQDGGGPFVCEDSISRTPRWRLCGIVSWGTCALAQKPGVYTKVSDPFEWI  355
          : : * : * : * : * : * : * : * : * : * : * : * : * : * : * : * : * : * : * : * : * : * :

TMPRSS2  YRQMRADG-----  492
1Z8G    FQAIKTHSEASGMVTQL  372
          : : : : : .

```

**Fig. S1.** Amino-acid sequence alignment of TMPRSS2-ECD and serine protease hepsin (sequence similarity: 33.8%). The sequence of the serine protease is taken from PDB ID: 1Z8G. Conserved residues are indicated by a (\*), strongly similar residues by a (:), and weakly similar residues by a (.). The color codes of the residues are: basic, DE, red; acidic, KR, pink; polar, CGHNQSTY, green and hydrophobic, AFILMPVW, red.

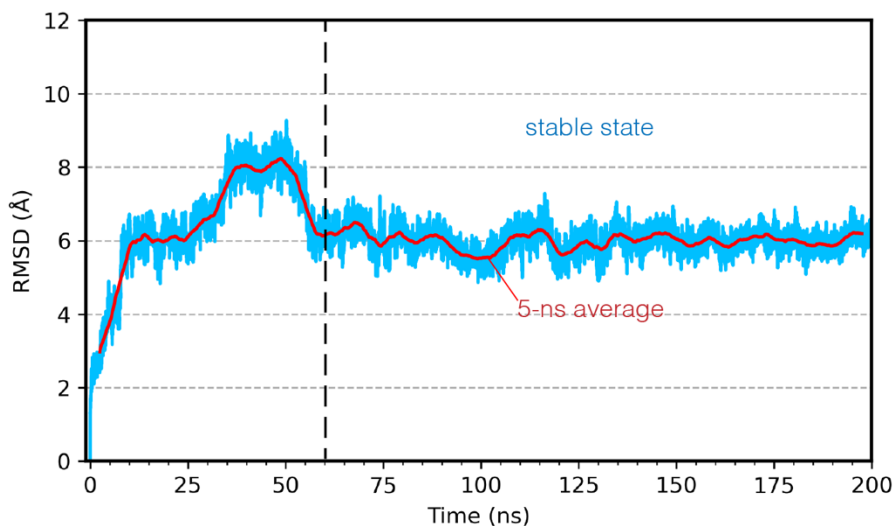

**Fig. S2.** Time-dependent RMSDs of the TMPRSS2-ECD model in the MD refinement. The initial structure of TMPRSS2-ECD is the reference structure for the RMSD calculations.

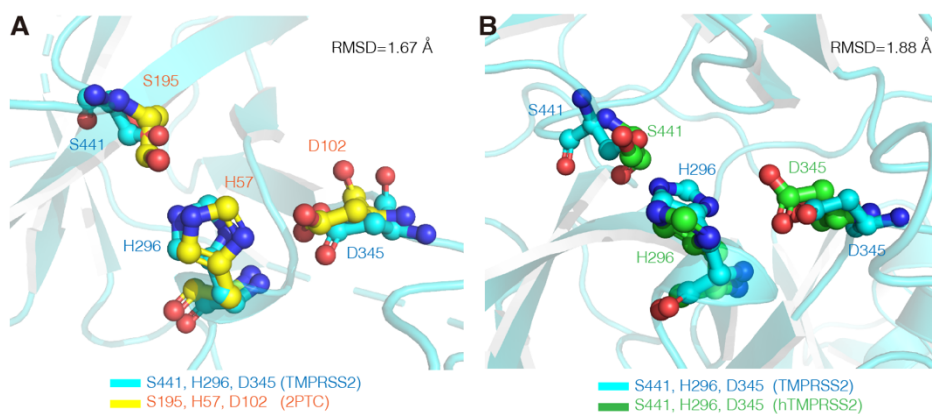

**Fig. S3.** Structural alignment of the catalytic amino acids of TMPRSS2 with trypsin and hTMPRSS2. (A) The RMSD of the catalytic triads of TMPRSS2 with trypsin (PDB ID: 2PTC) is 1.67 Å (where MPRSS2 in cyan, and trypsin in yellow). (B) The RMSD of the catalytic triads of TMPRSS2 with a recently published model (hTMPRSS2 on *Sci. Rep.* 2020, 10:15917) is 1.88 Å (where TMPRSS2 in cyan, and hTMPRSS2 in green).

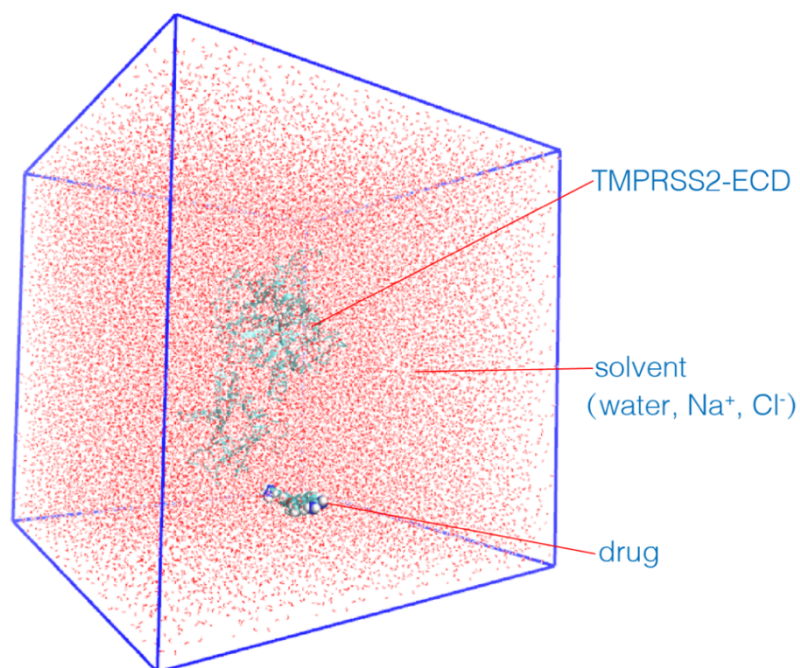

**Fig. S4.** A system for the spontaneous binding simulations. TMPRSS2-ECD is represented by the cartoon in cyan, the drug molecule (Camostat or Nafamostat) is represented by the spheres in cyan, and the solvent (water, Na<sup>+</sup> and Cl<sup>-</sup>) are represented by the sticks in red.

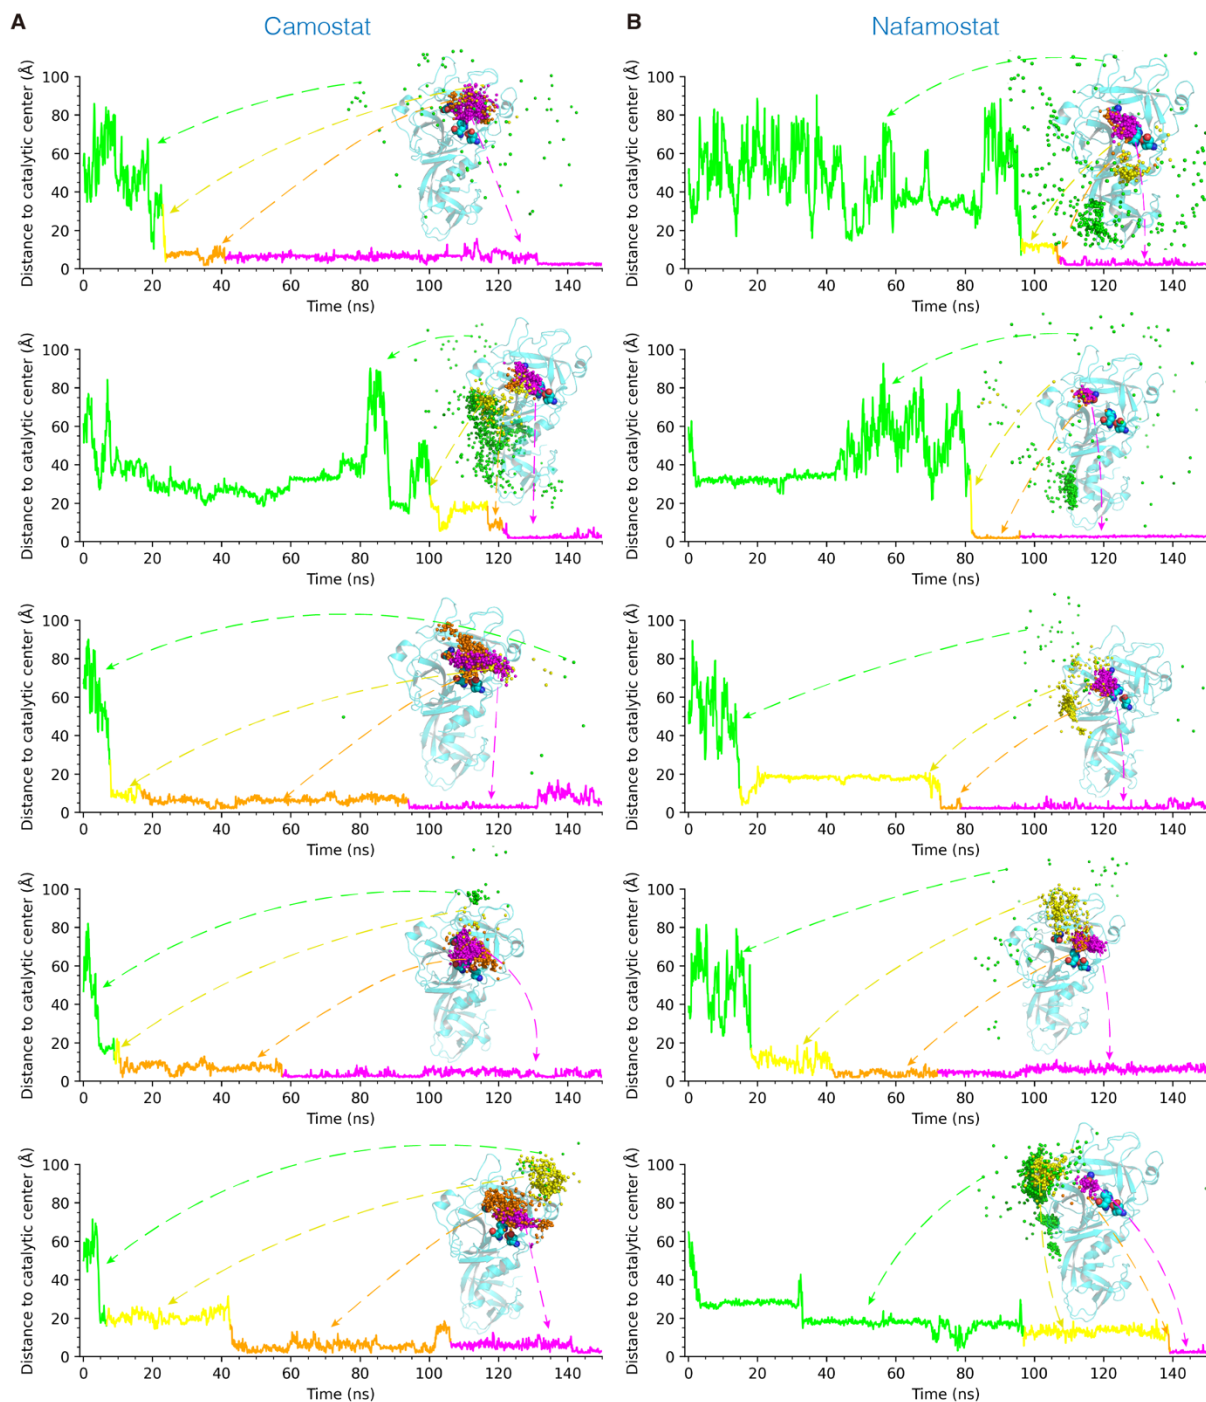

**Fig. S5.** Spontaneous binding processes to the catalytic center of TMPRSS2 in successful binding trajectories. (A) Time-dependent Camostat distance to the catalytic center ( $D_{cc}$ ) in other 5 successful binding trajectories. (B) Time-dependent Nafamostat distance to the catalytic center ( $D_{cc}$ ) in other 5 successful binding trajectories. TMPRSS2-ECD is represented by the cartoon in cyan, and corresponding drug positions represented by the drug atoms closest to the catalytic center (spheres in colors).

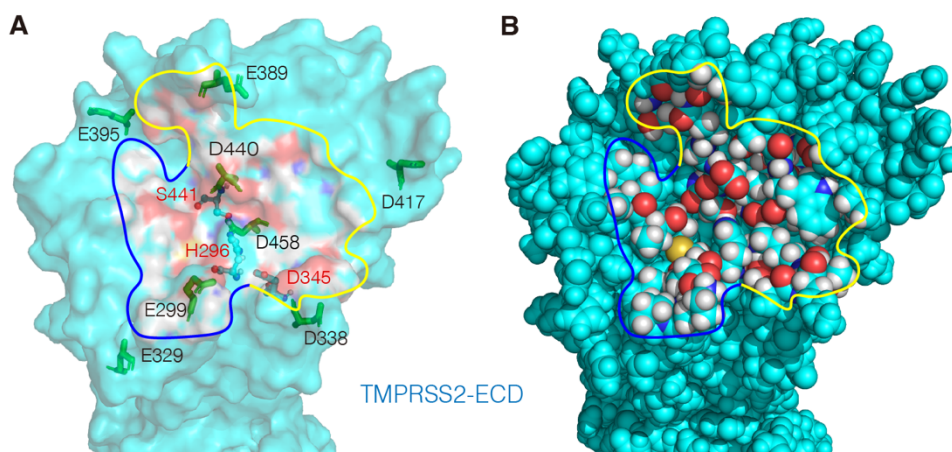

**Fig. S6.** 3D distributions of the Aps/Glu residues and oxygen atoms in/around the substrate-binding cavity of TMPRSS2. (A) The acidic amino acids (Asp/Glu) in/around the N-terminal and C-terminal binding regions are shown as sticks in green. (B) The oxygen atoms in the binding regions are shown as spheres in red.

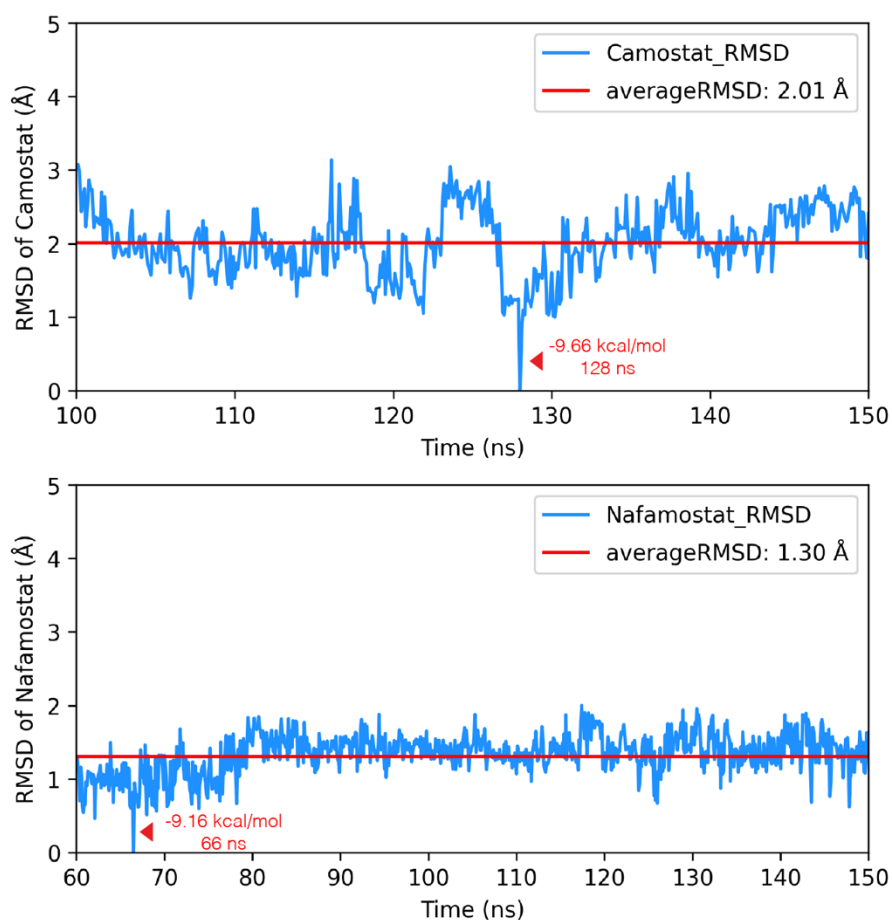

**Fig. S7.** The average RMSDs of drugs binding to the TMPRSS2 catalytic center. The average RMSDs of both drugs is less than 2.1 Å (Camostat:2.01 Å; Nafamostat:1.30 Å).The structure of drug with the lowest on-target binding free energy is the reference structure for the RMSD calculation.

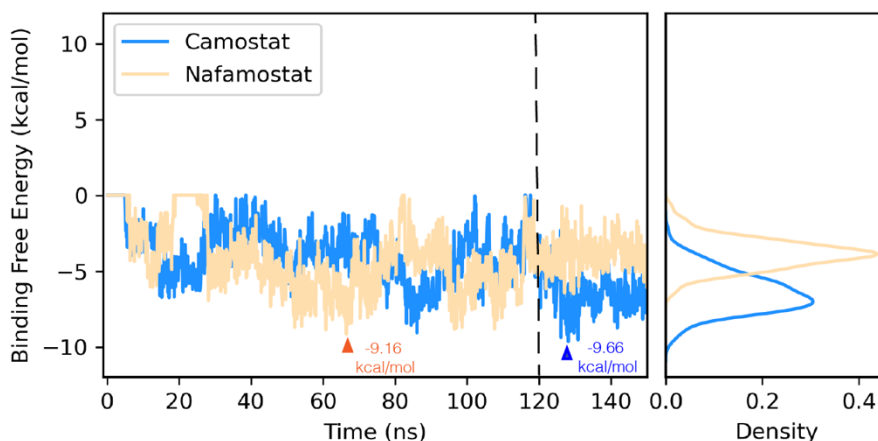

**Fig. S8.** Binding free energies of the drug-TMPRSS2 complexes formed in the spontaneous binding simulations in Fig. 3. The drug-TMPRSS2 complex conformations with the lowest binding free energy appear at ~128 ns (Camostat) and ~66 ns (Nafamostat), respectively. The free energy distributions of the drug-TMPRSS2 complexes in the last 30 ns (from 120 ns to 150 ns) trajectories are represented as the frequency densities in the right panel.

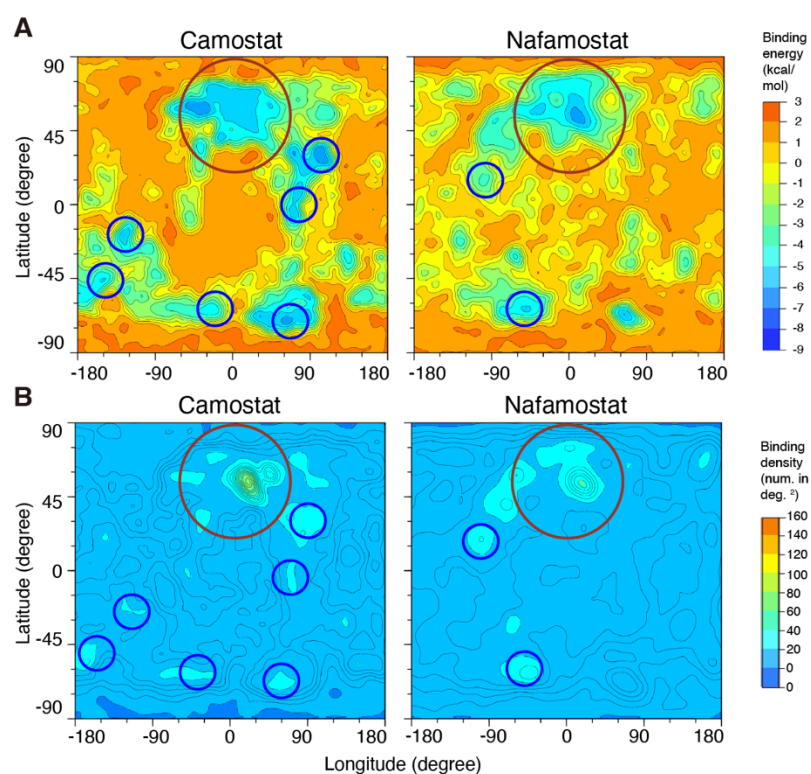

**Fig. S9.** The binding energy landscapes of all 30 spontaneous simulation trajectories. (A) The binding energy landscapes of the drug-TMPRSS2 complexes. (B) Corresponding binding probabilities of drugs. The on-target binding regions of drugs are indicated by red circles. The off-target binding hotspots with high binding probability are indicated by blue circles.

## **Movies**

**Movie S1.** A typical spontaneous binding trajectory of Camostat to TMPRSS2. Please see the MPEG4 file: `camo_binding.mp4`. For the sake of clarity, solvent molecules and ions are removed.

**Movie S2.** A typical spontaneous binding trajectory of Nafamostat to TMPRSS2. Please see the MPEG4 file: `nafa_binding.mp4`. For the sake of clarity, solvent molecules and ions are removed.
